# Supplementary material
Source: PubMed Central journal article supplement (PMC6361549)
Supplement: NIHMS1515513-supplement-3.pdf [file NIHMS1515513-supplement-3.pdf]

1 Supplementary Note:  
2 DDD Study author list: Nadia Akawi, Saeed Al-Turki, Kirsty Ambridge, Jeffrey Barrett, Daniel Barrett,  
3 Tanya Bayzetinova, Nigel Carter, Stephen Clayton, Eve Coomber, Helen Firth, Tomas Fitzgerald,  
4 David FitzPatrick, Sebastian Gerety, Susan Gribble, Matthew Hurles, Philip Jones, Wendy Jones,  
5 Daniel King, Netravathi Krishnappa, Laura Mason, Jeremy McRae, Parker Michael, Anna Middleton,  
6 Ray Miller, Katherine Morley, Vijaya Parthiban, Elena Prigmore, Diana Rajan, Alejandro Sifrim,  
7 Tarjinder Singh, Adrian Tivery, Margriet van Kogelenberg, and Caroline Wright.

8
